# Supplementary material
Source: PubMed Central journal article supplement (PMC1769331)
Supplement: NIHMS13867-supplement-01.pdf [file NIHMS13867-supplement-01.pdf]

## Supplementary Data

Substrate Recognition, Protein Dynamics, and Novel Iron-Sulfur Cluster in

*Pseudomonas aeruginosa* Adenosine Phosphosulfate Reductase

Justin Chartron, Kate S. Carroll, Carrie Shiau, Hong Gao,

Julie A. Leary, Carolyn R. Bertozzi, C. David Stout

## Materials and Methods

### *Materials*

Nonradioactive APS was purchased from Biolog Life Sciences Institute,  $\geq 95\%$  (Bremen, Germany).  $[^{35}\text{S}]\text{SO}_4^{2-}$  (specific activity 1491 Ci/mmol) was obtained from MP Biochemicals (Irvine, California, United States). Molecular biology grade DTT was from Invitrogen (Carlsbad, California, United States). *E. coli* Trx protein was purchased from EMD Biosciences (San Diego, California, United States). DPCC-treated trypsin was purchased from Sigma. Depending upon availability, PEI-Cellulose TLC plates (20 cm x 20 cm) were purchased from J.T. Baker (Phillipsburg, New Jersey, United States) or EMD Biosciences.  $^{35}\text{S}$ -labeled APS and PAPS were prepared by incubating  $[^{35}\text{S}]\text{Na}_2\text{SO}_4$ , ATP, ATP sulfurylase (Sigma), inorganic pyrophosphatase (Sigma) and recombinant APS kinase together as previously described<sup>1</sup>. All other chemicals were purchased from J. T. Baker and were of the highest purity available ( $\geq 95\%$ ).

### *Protein Expression and Purification*

The gene encoding the *M. tuberculosis* APS reductase was amplified from H37Rv *M. tuberculosis* genomic DNA and cloned in a protein expression vector as previously described<sup>2</sup>. The gene encoding *Mycobacterium smegmatis* APS reductase was amplified from *M. Smegmatis* genomic DNA and the gene encoding *P. aeruginosa* APS reductase was amplified from *P. aeruginosa* genomic DNA ATCC 47085D (ATCC, Manassas, Virginia, United States) as previously described<sup>1</sup>. Briefly, APS reductase genes were amplified via PCR and cloned into the pET24b vector (Novagen) using the 5' Nde I and 3' Xho I restriction enzyme sites. The expression plasmid encoding

*Rhizobium meliloti* APS reductase was generated as previously described<sup>3</sup>.

Proteins were expressed by transforming a reductase-containing plasmid into BL21(DE3) cells (Novagen) grown on LB-agarose containing 50 µg/ml kanamycin. An isolated colony was grown in 5 ml of LB broth containing 50 µg/ml kanamycin. The culture was grown at 37 °C overnight. This culture was used to inoculate 1 L of LB broth containing 50 µg/ml kanamycin. The culture was grown with shaking (250 rpm) at 37 °C to an OD of 0.6, and isopropyl-β-D-thiogalactopyranoside (IPTG) was added to a final concentration of 0.4 mM and the cells harvested after 4 h. Subsequently, 1 L of cells were collected by centrifugation and resuspended in 30 ml of lysis buffer (20 mM sodium phosphate, pH 7.4, 0.5 M sodium chloride (NaCl), 10 mM imidazole, 1mM methionine) together with an EDTA-free protease inhibitor tablet (Roche, Indianapolis, Indiana, United States). After sonication, DNase and RNase (Sigma) were added to the lysate at 10 µg/ml and 5 µg/ml, respectively, and stirred for 10 min on ice. The cell lysate was cleared by centrifugation and the supernatant was applied to a 5-ml HiTrap Chelating column (Amersham, Piscataway, New Jersey, United States). The column was washed with ten column volumes in 20 mM phosphate, pH 7.4, 0.5 M NaCl and 50 mM imidazole, and was eluted with 20 mM phosphate, pH 7.4, 0.5 M NaCl and 250 mM imidazole. Fractions containing the desired protein were pooled and concentrated using Amicon 10,000-Da molecular weight cut-off centrifugal filters (Millipore, Billerica, Massachusetts, United States) before injection onto a 16/60 Superdex 200 prep grade gel filtration column. The standard gel filtration buffer was 50 mM Tris-HCl, pH 8.0, 10% Glycerol, 5 mM DTT with ionic strength adjusted to 150 mM with NaCl. Fractions

containing APS reductase were pooled, aliquoted into single use portions, snap-frozen in liquid nitrogen and stored at -80 °C. Protein concentrations were determined precisely by quantitative amino acid analysis (AAA Service Laboratory, Boring, Oregon, United States).

#### *Mass Spectrometric Analysis of Dissolved Crystals and Enzyme-Substrate Complexes*

Solutions were infused at a rate of 2 µl/min into an Apollo electrospray source (Bruker, Billerica, MA), operated in the positive mode. The syringe and spray chamber were wrapped with ice bags to maintain low temperature, in order to prevent the protein from precipitating. All ions were collected using gated trapping and detected using chirp excitation. Broad band data were acquired using an average of 16-64 time domain transients containing 32 K or 1 M data points. The original time domain free induction decay (FID) spectra were zero filled, Gaussian-multiplied and Fourier transformed. All data were acquired and processed using Bruker Xmass version 6.0.0 software. The parameters of the electrospray ionization (ESI) source, ion optics, and cell were tuned for the best signal-to-noise ratio and were maintained for systematic experiments.

Crystals from 10 drops were harvested and centrifuged, yielding a brown pellet, which was washed three times in reservoir solution. The pellet dissolved readily in 10 µl of 2 mM β-octyl glucoside in H<sub>2</sub>O, and the resulting solution was discernibly light green-brown in color. The solution was incubated overnight with Biobeads to remove detergent and frozen. Subsequently, this sample was dialyzed against 50 mM ammonium acetate using Amicon 10,000-Da molecular weight cut-off centrifugal filters



to remove residual salt and detergent, and the protein concentration was determined (20  $\mu\text{M}$ ). This solution was then diluted with 80:20 acetonitrile:water containing 1% formic acid for mass spectrometry analysis. The derived molecular weights correspond to the full length polypeptide plus  $\text{SO}_3^-$  (31359.8 Da; theoretical 31360.1 Da) and the same minus the three N-terminal amino acids (31018.2 Da; theoretical 31018.6 Da) (50% of the protein used for crystallization lacked these residues) (Supplementary Figure 4(a)). The data indicate that the enzyme in the crystals is quantitatively sulfated.

For enzyme-substrate incubation experiments with *M. tuberculosis* APS reductase (Supplementary Figures 4(b), (c)), appropriate volumes of enzyme (after buffer exchange to ammonium acetate) and APS were mixed in ammonium acetate buffer and the mixtures were chilled on ice for at least 15 min before being introduced into the mass spectrometer.

### Supplementary References

1. Carroll, K. S., Gao, H., Chen, H., Stout, C. D., Leary, J. A. & Bertozzi, C. R. (2005). A conserved mechanism for sulfonucleotide reduction. *PLoS Biology* **3**, e250.
2. Williams, S. J., Senaratne, R. H., Mougous, J. D., Riley, L. W. & Bertozzi, C. R.

- (2002). 5'-Adenosinephosphosulfate lies at a metabolic branch point in mycobacteria. *J. Biol. Chem.* **277**, 32606-32615.
3. Schwedock, J. & Long, S. R. (1990). ATP sulphurylase activity of the nodP and nodQ gene products of *Rhizobium meliloti*. *Nature* **348**, 644-647.
  4. Thompson, J. D., Gibson, T. J., Plewniak, F., Jeanmougin, F. & Higgins, D. G. (1997). The CLUSTAL\_X windows interface: flexible strategies for multiple sequence alignment aided by quality analysis tools. *Nucleic Acids Res.* **25**, 4876-4882.

### Supplementary Figure Legends

**Supplementary Figure 1.** Routes of sulfate assimilation. Inorganic sulfate is adenylated by ATP sulfurylase (a) to form APS. Higher plants and the majority of sulfate reducing bacteria use APS as their source of sulfite ( $c_1 \rightarrow d \rightarrow e$ ). In some organisms, APS kinase (b) phosphorylates APS at the 3'-hydroxyl to form PAPS for use as a sulfate donor for sulfotransferases or as a source of sulfite. The lower pathway of sulfate reduction ( $c_2 \rightarrow d \rightarrow e$ ) is utilized by  $\gamma$ -proteobacteria such as *E. coli* and some fungi. Depending on the organism, APS or PAPS is reduced to sulfite by APS reductase ( $c_1$ ) and PAPS reductase ( $c_2$ ), respectively. Sulfite is reduced to sulfide by sulfite reductase (d) and incorporated into cysteine by O-acetylserine-(thiol) lyase (e). Important

metabolites such as methionine and coenzyme A are, in turn, synthesized from cysteine.

**Supplementary Figure 2.** Structure based sequence alignment of 38 APS reductases from prokaryotes and plants, and 34 PAPS reductases from prokaryotes and eukaryotes. The Clustal X (v1.81) Multiple Sequence Alignment program<sup>4</sup> was used first to define profiles for each group, then to align all APS reductase sequences (species names in square brackets) and all PAPS reductase sequences separately, and then to align all 72 sequences as one group. The figure is color coded by residue property. The bar graph indicates the degree of conservation per position and is included in Figure 3 under an abbreviated sequence alignment for four species.

**Supplementary Figure 3.** Electron density for APS in each of four subunits of *P. aeruginosa* APS reductase. The unbiased  $\sigma_A$ -weighted  $|F_o|-|F_c|$  map, based on the final model at 2.70 Å resolution, is contoured at 2.5  $\sigma$  and 5.0  $\sigma$ .

**Supplementary Figure 4. (a)** ESI FT-ICR mass spectrum of dissolved crystals of *P. aeruginosa* APS reductase demonstrating quantitative sulfonation of enzyme in the crystals. The two molecular weights correspond to the full-length enzyme plus  $\text{SO}_3^-$ , and the same minus the three N-terminal amino acids (~50% of the protein used for crystallization lacked these N-terminal residues). These molecular weights represent the apo-enzymes with the noncovalently bound [4Fe-4S] cluster dissociated from the protein during preparation of the sample for mass analysis (see Methods). **(b)** ESI FT-

ICR mass spectrum of 10  $\mu\text{M}$  *M. tuberculosis* APS reductase with 20  $\mu\text{M}$  APS in ammonium acetate showing that in the presence of excess substrate that the product AMP can be displaced, and that the sulfonated enzyme ( $\text{E-SO}_3^-$ ) can also bind APS, as observed in the crystals. Previously, 15  $\mu\text{M}$  enzyme was incubated with 10  $\mu\text{M}$  APS; under those conditions, only the sulfonated enzyme with AMP bound was observed (Figure 7(a) of ref. 7). **(c)** ESI mass spectrum of the same mixture dissolved in 80:20 acetonitrile:water containing 1% formic acid, illustrating the release of the noncovalently bound nucleotide and the iron-sulfur cluster. The inset shows the deconvoluted mass of the thiosulfonate intermediate in the apo-form.

**Supplementary Figure 5.** Partial trypsin proteolysis of *M. tuberculosis* **(a)** and *P. aeruginosa* **(b)** APS reductase showing protection of the C-terminal tail and the Arg-loop upon formation of the thiosulfonate intermediate at equimolar concentration. The time course of the trypsin digestion is shown in the presence (+APS) and absence (-APS) for each enzyme. In **(a)** *M. tuberculosis* APS reductase (50  $\mu\text{M}$  active site concentration) was incubated with or without 50  $\mu\text{M}$  APS for 10 min at RT, and trypsin was added at a final concentration of 10  $\mu\text{g/ml}$  and incubated at 4  $^\circ\text{C}$ . In **(b)** *P. aeruginosa* APS reductase (40  $\mu\text{M}$  active site concentration) was incubated with or without 40  $\mu\text{M}$  APS for 10 min at RT, and trypsin was added at a final concentration of 10  $\mu\text{g/ml}$  and incubated at 4  $^\circ\text{C}$ . All samples were analyzed by SDS-PAGE using a 4-12% gradient Criterion gel. Trypsin digest fragments were purified by reverse phase HPLC and analyzed by electrospray mass spectrometry. In the presence of APS, the starred fragments, HR/G – End\* for *M. tuberculosis* and ER/N – SK/A\* for *P. aeruginosa*,

represent the mass of the peptide fragment plus an additional 80 Da for the covalent sulfite adduct. Full length *M. tuberculosis* APS reductase without N-terminal Met, is 28,356.87 Da; full length *P. aeruginosa* APS reductase is 31,279.6 Da.

**Supplementary Figure 6.** Electron density for the [4Fe-4S] cluster and its Cys ligands in Subunit B of *P. aeruginosa* APS reductase. The  $\sigma_A$ -weighted  $2|F_o|-|F_c|$  map, based on the final model at 2.70 Å resolution, is contoured at 1.0  $\sigma$  and 5.0  $\sigma$ . The C $\alpha$ -C $\beta$ -S $\gamma$ -Fe torsion angle for Cys140 is indicated; this angle is *cis* (+10°) so that the C $\alpha$  and Fe atoms are eclipsed and only 3.5 Å apart.

**Supplementary Table 1**  
**Effect of reductants on APS reductase activity <sup>a</sup>**

| Reductant <sup>b</sup> | E <sup>o</sup> , mV | Activity (pmol/min) <sup>c</sup> |
|------------------------|---------------------|----------------------------------|
| Thioredoxin            | -260                | 40                               |
| GSH                    | -230                | ≤ 0.1                            |
| Reduced lipoic acid    | -290                | ≤ 0.1                            |
| DTT                    | -330                | ≤ 0.1                            |
| Dithionite             | -527                | ≤ 0.1                            |

(a) Rate of APS reduction measured with various reductants. Each value reflects the average of at least two independent experiments, and the standard deviation was less than 15% of the value of the mean.

(b) 10 μM thioredoxin or 10 mM chemical reductant was used in each assay (see Methods).

(c) Due to the slow nature of the reactions measured with chemical reductants, reported rates are considered upper limits.

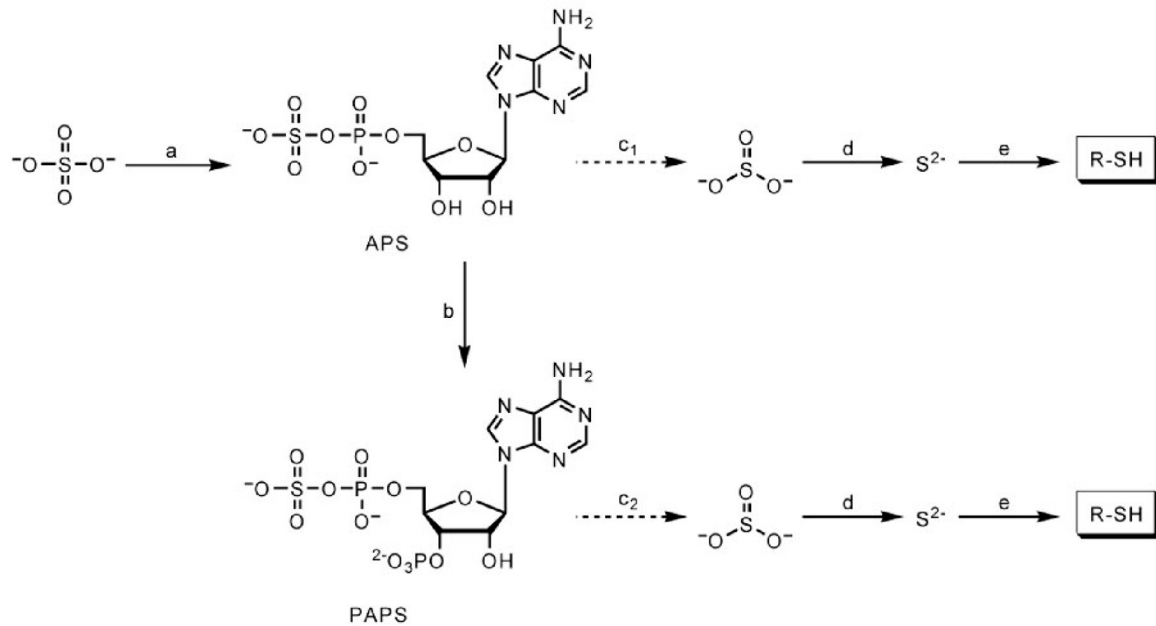

**Supplementary Fig. 1**



# Supplementary Fig. 2

## Page 1 of APSr and PAPSr sequences

|                                |                                                                         |     |
|--------------------------------|-------------------------------------------------------------------------|-----|
| [Mycobacterium tuberculosis]   | -----MSGETRLTSPQLRELAARGAAELDGATATDMLRWIDETFGDIGGAGGGVSGHRGWT           | 57  |
| [Pseudomonas aeruginosa]       | MLPFPATIPA-----TERNSAAQHQPSPMSQPFDPALASSLADKS-PQDILKAA-----FEHFQDE      | 56  |
| [Pseudomonas syringae]         | -----MSQPFVVAELATTYANKS-AQDILKLA-----FEHFQDE                            | 33  |
| [Pseudomonas fluorescens]      | -----MSPTFDVVELATTYANKS-AQDILKLA-----FAEFQDD                            | 33  |
| [Pseudomonas putida]           | -----MSQPFVVAALAAATYANKS-PQDILKLA-----FEHFQDD                           | 33  |
| [Azotobacter vinelandii]       | -----MKQAVNFAEALAAAGIGKS-PQDILQIA-----FDHFQDD                           | 33  |
| [Methylococcus capsulatus]     | MT-----QIEIDTLQAELAGRS-PRITILEYA-----LSRF-QR                            | 31  |
| [Microbulbifer degradans]      | MSN-----TIDFTDIDAKLQQAQ-FOILIYA-----LAE-NDN                             | 32  |
| [Ceratopteris richardii]       | VVRAGLFGQRSSENVFQRSCSVQPSDKHRCGLNAAIATPEVQVEDINVEDLALQLVDASPLEIMDRA     | 111 |
| [Polygonatum pubescens]        | LRKRWAVNVMFQKRNDSVAASAVADLAAVVEEKARALEKEVEVADYEKTAVELQNASPLEIMDRA       | 114 |
| [Zea mays]                     | AARQQRARAVRSLRAAEPARQPVASAAAAAPAAPVADAAALAAVDYEALEARLEGASPLEIMDRA       | 112 |
| [Lycopersicon esculentum]      | LSSTVLNRRRSVAVKPLIYAEKRNDSIVPSAATIVAVEVGESEVAEDFEKLAKELQNASPLEVMDKA     | 115 |
| [Catharanthus roseus]          | ISPSVNVSRRLAVKFINAEPKRNESIIVPSAATIVAVEVEEKVDVEDYEKLADLQNASPLEIMDKS      | 114 |
| [Brassica juncea]              | VSSVLSLSLQKRSVVKPLNVQSIKESFVSAASEVTEKQDVVEVEDFEELAKLETASPLEIMDKA        | 116 |
| [Arabidopsis thaliana]         | RTNVSAASLSLQKRSVVKALNVQSIKESIVASEVTEKLDVVEVEDFEELAKLENASPLEIMDKA        | 111 |
| [Lemna minor]                  | PMRPLCAVDPRKRSQSPVAPLAAVPSSTSDAVTLVQAETSIVDVVDFEKLASLERASPLEIMDKA       | 116 |
| [Chlamydomonas reinhardtii]    | FAAQRPAVQ-----QRRMAVRANVARVQVNAAAVEAKPDWAGLAAEMDNKS-PLIEMDHA            | 70  |
| [Nocardioides sp. JS614 2]     | MTAATTNSARN-----FRGITAGRSSEELRVSHWGALELELAPADIVWA-----VAT-----FGER----- | 82  |
| [Desulfitobacterium hafniense] | IIWNRLLGEEPDSFMTWEGIQKQRRRNMEDRSDFLNLDLDIRAFAGED-PRKLLAHV-VEK-IGPA      | 78  |
| [Pyrobaculum aerophilum]       | MRR-----EWTDLVEELSLRFENST-AEHLLSWA-LNE-F-YP                             | 35  |
| [Clostridium thermocellum]     | MVQ-----LDLEKLNKEYSDKS-PEDIVRFV-VEN-IGI                                 | 32  |
| [Bordetella parapertussis]     | MMA-----ARPLAALAGLTAARWHDLSRLAI-IAR-QYP                                 | 36  |
| [Burkholderia mallei]          | AA-----HAFALT--FALAEEKARLDALLAQ-IAA-RHP                                 | 30  |
| [Ralstonia eutropha]           | MSGLSDIIV-----VDGGAPASAL-RFTLWTWVTEGSLADLDEKERELARLAG-IAA-RFF           | 55  |
| [Ralstonia solanacearum]       | MSALQEAAV-----SE--VPMSTIGRFVLWSRFVITGTPEGLAVKEALLERLIE-IAA-KHG          | 54  |
| [Dechloromonas aromatica]      | MTP-----SLNLIPELTASVAVKRTVVKALLAD-IAT-NWS                               | 35  |
| [Sinorhizobium meliloti]       | MTT-----QSLKAEVALEADWMLQAAKALNDKLESLDLAQRALIA-GLG                       | 48  |
| [Wolfinella succinogenes]      | MR-----DAIKESLERLC--EVKGLI-4                                            | 20  |
| [Bacillus subtilis]            | MLT-----YDNWEEPIITFPEDDPYKQ-ALSVLKWA-YGH-YGDQ                           | 37  |
| [Corynebacterium glutamicum]   | MSP-----EVAKHNEELVEKHAALYDAS-AQELIETW-AEH-APGA                          | 39  |
| [Corynebacterium efficiens]    | VTVNALKNAGPTQDPEVSPGEPRIITAPLPEEVAHRNRELVDKHADELYHADAATILEWA-AEH-VGR    | 69  |
| [Nocardioides sp. JS614]       | MFK-----TERDLQRLQAVVFEAAEELEQVS-ADSVVRNA-RDT-FGTK                       | 41  |
| [Chloroflexus aurantiacus]     | MTT-----QYWDAN-----IDPRDVIRWA-LAG-YPD                                   | 25  |
| [Deinococcus geothermalis]     | MTALEDRSP-----ASRRPPDLPFTTPTPEIDPLDVVRAW-LKA-HPD                        | 40  |
| [Deinococcus radiodurans]      | MMAEVRTP-----EQGGGLTTEPRAPRSPGHADASAPAFGPETDPRDIIRWA-LAA-HPD            | 56  |
| [Nitrobacter winogradskyi]     | MTPLEENS-----VDPGRAAQSAANAANSAMPAAAALESRLDAS-PAVIVSAA-LRA-VGRD          | 56  |
| [Nitrobacter hamburgensis]     | VSYISDGRRTSLPEQKSVASAMTQPAATGTTPALPPAAALNDALRDAR-PADVIAAA-LRT-VGRD      | 74  |
| [Cytophaga hutchinsonii]       | MNK-----EEIHLKLTXYQ-EKGLKFT-4                                           | 23  |
| Salmonella typhimurium         | MSQ-----LDLNALNELPKVDVRYMALAETNAQLEKLS-AEERVAWA-LEN-LPGE                | 47  |
| Escherichia coli               | MSK-----LDLNALNELPKVDRIILALAEINAELEKLD-AEGRVAWA-LDN-LPGE                | 47  |
| Erwinia carotovora             | MAE-----FNLEALNALPKDEQVAALAAVNGQLEQLS-AQERVSWA-LEN-LPGD                 | 47  |
| Yersinia pseudotuberculosis    | MSQ-----FNLESENALPKAKQAAALVVLVNGQLEHLT-AQERVSWA-LDN-LPGE                | 47  |
| Zymomonas mobilis              | MSA-----PHLETKSLPKABEQEALSEANRQLEMS-AEDRLKWA-FDN-LSGQ                   | 47  |
| Photorhabdus luminescens       | MSQ-----FSLSQCVSMTARQEQQSIAEINLRLEMMD-AHQRVNWA-LEN-LPGE                 | 47  |
| Vibrio parahaemolyticus        | MLDSVA-----SKPELAEALLTLTKTEQILRLAEQINVELEPLS-AQERVKWA-LEN-LDGE          | 52  |
| Vibrio vulnificus              | MLDSVA-----STLQSELLSLTKAEQSLRLAEINVELEMLS-AQERVAWA-LQN-LBGA             | 52  |
| Vibrio fischeri                | MP-----KLQSELLSLTKVEQTLRLAEVNVLEKLT-AQERVVWA-LEN-LSGN                   | 47  |
| Vibrio cholerae                | MPN-R-----TVETLEELLTKNVQQTILRLAEVNVHLESLT-AQERVVWG-LEN-LOGN             | 50  |
| Photobacterium profundum       | MPN-----YALADLLEKTKIEQILQAEINAELEALS-AQERVVWA-LAN-LGSE                  | 47  |
| Candidatus Blochmannia         | MNKLINVIN-----HCWTVTEFNSLDINEQKLVLVKINRYLESIN-IVDRFKWA-IEY-LPKQ         | 55  |
| Candidatus Blochmannia florida | MNR-----CWCVEELDLVIGVERALINEINQYLESVT-IEDRIMVW-MKY-LSGQ                 | 48  |
| Buchnera aphidicola            | MSKFY-----IENINLNSKKNKNIISELNLNLSNYS-AEERISWA-LSH-LPHT                  | 47  |
| Xanthomonas oryzae             | MTA-----LPAASISALADD--LDALNAQLEGLR-ADERVAWA-LQH-GPQD                    | 43  |
| Xanthomonas campestris         | MTA-----LPAASISALADD--LDALNAHLETLR-ADERVAWA-LQH-GPQQ                    | 43  |
| Xylella fastidiosa             | MTV-----LPAL--PLDD--LETLNVHLETLS-AENRVCAW-LER-GPDP                      | 43  |
| Thiocapsa roseopercidina       | MSK-----PDDDAF-LHQDDAALREINRRELSMP-AEDRVVWA-LEH-LPPQ                    | 39  |
| Pseudoalteromonas haloplanktis | MSEF-----KNILQLDKQSQTSMMLADANGILKNMS-AEQRVQWA-LEN-LPET                  | 45  |
| Shewanella oneidensis          | MSS-----SELKALLTAPKSVQQAELERINRFLAGLT-AQERVVWG-LAY-LPGN                 | 47  |
| Shewanella frigidimarina       | MPNEVVTTAPTGAADVDSVTPAQQLQALLAPKAEQTAELININFLAGLT-AQERVVWG-LAY-LPGD     | 65  |
| Shewanella denitrificans       | MDKDGLSNNSN-----NAVISPALKQLLLAPKDEQVRELERINGPLSSLS-AQERVVWG-LAY-LPGE    | 61  |
| Shewanella amazonensis         | MN-----VHLLSLDAAEQAAALEIDINLQAKAT-PTERVFPA-LRE-LPGE                     | 44  |
| Colwellia psychroerythraea     | MLNITTTG-----IADKELSPPEVTFPPHATGEWNSQLEKQT-AIARAQWA-MEN-LPQG            | 52  |
| Crocospaera watsonii           | MPQSNLHLINSHVDN--HQVSEHYNKQTEQAYKPELSLKEVNSQLENAN-AQVVVETW-RET-FGEG     | 63  |
| Prochlorococcus marinus        | MTDQSIDTVST-----ATSTAAGQSPEVQVSTLEMPLEDARIHLANLS-AQKRLWA-LKQ-FQGG       | 59  |
| Trichodesmium erythraeum       | MLDQSLIRLN-----KNGQYNYQDYRYLPELDLGVNVQELSAD-FHTLVQWG-LKI-FKEG           | 54  |
| Synechococcus elongatus        | MFA-----LLPSTLEINAQLADQA-ATLIQWA-ATE-FSGS                               | 42  |
| Anabaena variabilis            | MTA-----STAFK-----TQTFNFDLDELNQCFETAL-PKEILAWS-IEH-LPTG                 | 34  |
| Schizosaccharomyces pombe      | MSSIDT-----PANKLQARTLPHPEHLEYINKQSELS-PQDILKWC-RWT-LPS                  | 47  |
| Saccharomyces cerevisiae       | MKTYH-----LNNDIVTQEQDLHWNEQILKLETPOEIIAWS-IVT-FPH                       | 43  |
| Thermosynechococcus elongatus  | MPS-----KMTLTPMMAASVSFDLDALNQRFEAGH-PRDILAWA-VTE-IPQG                   | 45  |
| Neurospora crassa              | SQTSTRASSPKLCKFDDNASVDSGFASANSSTANPLSLKPHLDHLNKLENMALDILRFCKI--L-FPN    | 77  |
| Aspergillus fumigatus          | SDAEAAVDSRDLQTESGYVSDSSDVTYVEIVFTKPHLQFLNRQLQFLE-FOEILRWC-----ITS-LPH   | 73  |



|                                |                              |                                        |                      |     |
|--------------------------------|------------------------------|----------------------------------------|----------------------|-----|
| [Mycobacterium tuberculosis]   | TCNVVASNMADAVLVDLAAKVRPG     | VPVIFLDLGYHFEVETIGTRDAISSVVDVR         | -VLNVTPEHIVAEQDELL   | 128 |
| [Pseudomonas aeruginosa]       | -LWISFS-GAEDVVLVDMMAKLNKN    | -VKVFSLDLTRLHPETVYRFIDQVREHKGIAIDVLS   | DDPRLLEPLVVKRGG      | 127 |
| [Pseudomonas syringae]         | -LWISFS-GAEDVVLVDMMAKLNKN    | -VKVFSLDLTRLHPETVYRFIDQVREHKGIDIVLS    | DDPRLLEPLVVKRGG      | 104 |
| [Pseudomonas fluorescens]      | -LWISFS-GAEDVVLVDMMAKLNKN    | -VKVFSLDLTRLHPETVYRFIDQVREHKGIDIVLS    | DDPRLLEPLVVKRGG      | 104 |
| [Pseudomonas putida]           | -LWISFS-GAEDVVLVDMMAKLNKN    | -VKVFSLDLTRLHPETVYRFIDQVREHKGIDIVLS    | DDPRLLEPLVVKRGG      | 104 |
| [Azotobacter vinelandii]       | -LWISFS-GAEDVVLVDMMAKLNKN    | -VKVFSLDLTRLHPETVYRFIDQVREHKGIDIVLS    | DDPRLLEPLVVKRGG      | 104 |
| [Methylobacterium capsulatus]  | -IAVFSF-GAEDVVLVEMAARLRFG    | -IEVFLDLDLTRLHPETVYRFIDQVREHKGIDIVLS   | DDPRLLEPLVVKRGG      | 102 |
| [Microbulbifer degradans]      | -LWISFS-GAEDVVLVDMASKIKPG    | -VQVCFLLDTRLHAEITYQFIEQVRKHDKIDKLDVLP  | DDPRLLEPLVVKRGG      | 103 |
| [Ceratopteris richardii]       | -IAIAFS-GAEDVALIEYA-KLTGR    | -PFRVFSLDLTRLNPETVYRFDFVEKHYGIRIEM     | YMPDASEVEALVRSKG     | 182 |
| [Polygonatum pubescens]        | -IAIAFS-GAEDVALIEYA-KLTGR    | -PFRVFSLDLTRLNPETVYRFDFVEKHYGIRIEM     | YMPDASEVEALVRSKG     | 183 |
| [Zea mays]                     | -IAIAFS-GAEDVALIEYA-KLTGR    | -PFRVFSLDLTRLNPETVYRFDFVEKHYGIRIEM     | YMPDASEVEALVRSKG     | 185 |
| [Lycopersicon esculentum]      | -IAIAFS-GAEDVALIEYA-HLTGR    | -PFRVFSLDLTRLNPETVYRFDFVEKHYGIRIEM     | YMPDASEVEALVRSKG     | 186 |
| [Catharanthus roseus]          | -IAIAFS-GAEDVALIEYA-HLTGR    | -PFRVFSLDLTRLNPETVYRFDFVEKHYGIRIEM     | YMPDASEVEALVRSKG     | 185 |
| [Brassica juncea]              | -IAIAFS-GAEDVALIEYA-HLTGR    | -PFRVFSLDLTRLNPETVYRFDFVEKHYGIRIEM     | YMPDASEVEALVRSKG     | 187 |
| [Arabidopsis thaliana]         | -IAIAFS-GAEDVALIEYA-HLTGR    | -PFRVFSLDLTRLNPETVYRFDFVEKHYGIRIEM     | YMPDASEVEALVRSKG     | 182 |
| [Lemna minor]                  | -IAIAFS-GAEDVALIEYA-HLTGR    | -PFRVFSLDLTRLNPETVYRFDFVEKHYGIRIEM     | YMPDASEVEALVRSKG     | 187 |
| [Chlamydomonas reinhardtii]    | -VIAAFS-GAEDVALIEYA-HLTGR    | -PFRVFSLDLTRLNPETVYRFDFVEKHYGIRIEM     | YMPDASEVEALVRSKG     | 141 |
| [Nocardioideus sp. JS614.2]    | FC-VTSS--MADAVLAHLVSRVAFG    | -IDVFLDLDGYHFAETIGTRDAVQATLQVNV        | --LIITVQVQSAQDA      | 159 |
| [Desulfobacterium hafnense]    | RIALAASLSIHDQVLTQMLKIDAR     | --IRFFIIDLGRNFQOTYDLMEETMSRHEGFIH      | YVAPENSELFLPAIEY     | 141 |
| [Pyrobaculum aerophilum]       | NIALAFSGAEDVVVDLIMKRVAPD     | -KIRVFMLDTRLPEEIEVLVDKVRHHGVEIEI       | YVYVPTKEIEEFVKRGG    | 109 |
| [Clostridium thermocellum]     | KVALAASLSIHDQVLTDLIKINP      | -KRVVFLDTRLGRHPQOTYDLMEETMSRHEGFIH     | YVAPENSELFLPAIEY     | 105 |
| [Bordetella parapertussis]     | DAALASLSAARDMVLTHAIYAGG      | -LDLEVFLLDTRLHAEITLGLVDAVATRYGRAIT     | YVYRPPDAAEQVAVDHAG   | 109 |
| [Burkholderia mallei]          | KVKFASLSAARDMVLTHAIYAGG      | -VAIGFISLDTGRHAEITLGLVDAVATRYGRAIT     | YVYRPPDAAEQVAVDHAG   | 103 |
| [Ralstonia eutropha]           | RARFATLSAARDMVLTHAIYAGG      | -RAGIRVFLDTRLHAEITLGLVDAVATRYGRAIT     | YVYRPPDAAEQVAVDHAG   | 102 |
| [Ralstonia solanacearum]       | TAKFASLSAARDMVLTHAIYAGG      | -RAHLPFLDTRLHAEITLGLVDAVATRYGRAIT      | YVYRPPDAAEQVAVDHAG   | 131 |
| [Dechloromonas aromatica]      | SAAFANLSAARDMVLTHAIYAGG      | -LPIEFSLDTRLPLEYDILAAVDKHHGLRLKLL      | YVYRPPDAAEQVAVDHAG   | 108 |
| [Sinorhizobium meliloti]       | RAVFTLSLGIHQDQVLTAAIGSNR     | -LDIEVALDTRLHAEITLGLVDAVATRYGRAIT      | YVYRPPDAAEQVAVDHAG   | 121 |
| [Wolinella succinogenes]       | --LAFSHQARDVVVDLIMKRVAPD     | -SFEVFLDTRLHAEITLGLVDAVATRYGRAIT       | YVYRPPDAAEQVAVDHAG   | 91  |
| [Bacillus subtilis]            | -LVYACSFQIEGIVLIDLILKYVKK    | -DAEIVFLDTRLHAEITLGLVDAVATRYGRAIT      | YVYRPPDAAEQVAVDHAG   | 109 |
| [Corynebacterium glutamicum]   | IA-VTSS--MENTVLAELAAARHLPE   | -ADPFLDLDGYHFEVETIGTRDAISSVVDVR        | -SKLVYVPLIKRTEQSDIY  | 108 |
| [Corynebacterium efficiens]    | VA-VTSS--MENTVLAELAAARHLPE   | -QADFLDLDGYHFEVETIGTRDAISSVVDVR        | -SKLVYVPLIKRTEQSDIY  | 136 |
| [Nocardioideus sp. JS614]      | LC-ATSS--MSDAATHLASSCAPG     | -LDVFLDLDGYHFEVETIGTRDAISSVVDVR        | -SKLVYVPLIKRTEQSDIY  | 105 |
| [Chloroflexus aurantiacus]     | -LLMSTAFNLNGVVLIELA-AQAG     | -FA-GEVVFVDTGYHFPPELAWRDLITRPPV        | LLSADLPPVWGE----     | 94  |
| [Deinococcus geothermalis]     | -LLMSTAFNLNGVVLIELA-AQAG     | -YR-GEVVFVDTGYHFPPELAWRDLITRPPV        | LLSADLPPVWGE----     | 111 |
| [Deinococcus radiodurans]      | -LLMSTAFNLNGVVLIELA-AQAG     | -YR-GEVVFVDTGYHFPPELAWRDLITRPPV        | LLSADLPPVWGE----     | 127 |
| [Nitrobacter winogradskyi]     | RLALVSSFGTSSAALLKVM-ADVDP    | -A-IPVIFLDTGWLFEETLITRDTLAAALGLD       | KVDSRIFPSSDALKQEDPDR | 129 |
| [Nitrobacter hamburgensis]     | RLALVSSFGTSSAALLKVM-ADVDP    | -A-IPVIFLDTGWLFEETLITRDTLAAALGLD       | KVDSRIFPSSDALKQEDPDR | 145 |
| [Cytophaga hutchinsonii]       | ----SSPQTHSIVLHLL-SEDFP      | -S-IPVIFLDTGWLFEETLITRDTLAAALGLD       | KVDSRIFPSSDALKQEDPDR | 91  |
| Salmonella typhimurium         | -FVLSSTFGICAAVSLHLV-NQIR     | -PDIPVILDDTGYLFPETVYRFIDELTKKLN        | --LKVYRAESPAWQEAR    | 116 |
| Escherichia coli               | -FVLSSTFGICAAVSLHLV-NQIR     | -PDIPVILDDTGYLFPETVYRFIDELTKKLN        | --LKVYRAESPAWQEAR    | 116 |
| Erwinia carotovora             | -FVLSSTFGICAAVSLHLV-TQQR     | -PDIPVILDDTGYLFPETVYRFIDELTKKLN        | --LKVYRAESPAWQEAR    | 116 |
| Yersinia pseudotuberculosis    | -FVLSSTFGICAAVSLHLV-TQQR     | -PDIPVILDDTGYLFPETVYRFIDELTKKLN        | --LKVYRAESPAWQEAR    | 116 |
| Zymomonas mobilis              | -FVLSSTFGICAAVSLHLV-TRKK     | -ADIPVILDDTGYLFPETVYRFIDELTKKLN        | --LQVYRAESPAWQEAR    | 116 |
| Photobacterium luminescens     | -FVLSSTFGICAAVSLHLV-TQXY     | -PDIPVILDDTGYLFPETVYRFIDELTKKLN        | --LQVYRAESPAWQEAR    | 116 |
| Vibrio parahaemolyticus        | -FVLSSTFGICAAVSLHLV-TQEX     | -PDIPVILDDTGYLFPETVYRFIDELTKKLN        | --LQVYRAESPAWQEAR    | 121 |
| Vibrio vulnificus              | -HAVSSSTFGICAAVSLHLV-SKQQ    | -ADIPVILDDTGYLFPETVYRFIDELTKKLN        | --LKVYRAESPAWQEAR    | 121 |
| Vibrio fischeri                | -FVLSSTFGICAAVSLHLV-TEVK     | -SDIPVILDDTGYLFPETVYRFIDELTKKLN        | --LKVYRAESPAWQEAR    | 116 |
| Vibrio cholerae                | -HALSSSTFGICAAVSLHLV-TSVK    | -SDIPVILDDTGYLFPETVYRFIDELTKKLN        | --LKVYRAESPAWQEAR    | 119 |
| Photobacterium profundum       | -FVLSSTFGICAAVSLHLV-TNES     | -PKVIVLDDTGYLFPETVYRFIDELTKKLN         | --LKVYRAESPAWQEAR    | 116 |
| Candidatus Blochmannia         | -AILSSSTFGICSSVSLHLV-THYI    | -ENIPVILDDTGYLFPETVYRFIDELTKKLN        | --LHVFSPQSAWQEAR     | 124 |
| Candidatus Blochmannia florida | -LVLSSSTFGICHSVSLHLV-TNXY    | -PSVIVLDDTGYLFPETVYRFIDELTKKLN         | --LHVFSPQSAWQEAR     | 117 |
| Buchnera aphidicola            | -QIMSSSTFGICSVLHLL-IKKQ      | -PDIPVILDDTGYLFPETVYRFIDELTKKLN        | --LKVFRSTISSAWQEAR   | 116 |
| Xanthomonas oryzae             | -AALSSSTFGICSAVLLHLL-SQQR    | -PDIPVILDDTGYLFPETVYRFADALTEKLSL       | --LKVYRPLVSRAMWQEAR  | 112 |
| Xanthomonas campestris         | -AALSSSTFGICSAVLLHLL-TQQR    | -PDIPVILDDTGYLFPETVYRFADALTEKLSL       | --LQYVPLVSRAMWQEAR   | 112 |
| Xylella fastidiosa             | -PALSSSTFGICSAVLLHLL-TRFA    | -PDIPVILDDTGYLFPETVYRFADALTEKLSL       | --LKVYQPLVSRAMWQEAR  | 108 |
| Thiopsis roseopercarina        | -FVLSSTFGICSAVLLHLL-SRQM     | -PEIPVILDDTGYLFPETVYRFADALTEKLSL       | --LKVYRPLVSRAMWQEAR  | 112 |
| Pseudoalteromonas haloplanktis | -HPLSSSTFGICSAVLLHLL-TLQQ    | -PDIPVILDDTGYLFPETVYRFADALTEKLSL       | --LKVYRPLVSRAMWQEAR  | 114 |
| Shewanella oneidensis          | -HALSSSTFGICSAVLLHLL-SVQQ    | -SDIPVILDDTGYLFPETVYRFADALTEKLSL       | --LKVYQAPVSRAMWQEAR  | 116 |
| Shewanella frigidimarina       | -HALSSSTFGICSAVLLHLL-TQAA    | -SDIPVILDDTGYLFPETVYRFADALTEKLSL       | --LKVYQAGQVSRAMWQEAR | 114 |
| Shewanella denitificans        | -HGLSSSTFGICSAVLLHLL-TQVQ    | -SDIPVILDDTGYLFPETVYRFADALTEKLSL       | --LKVYQAGQVSRAMWQEAR | 130 |
| Shewanella amazonensis         | -HILSSSTFGICSAVLLHLL-THYK    | -SDVPVILDDTGYLFPETVYRFADALTEKLSL       | --LKVYRPAVSRAMWQEAR  | 113 |
| Colwellia psychroerythraea     | -FVLSSTFGICSAVLLHLL-TQVD     | -SNIPVILDDTGYLFPETVYRFADALTEKLSL       | --LQYVQAKESPAWQEAR   | 121 |
| Crocospaera watsonii           | -LVMSSSTFGICSAVLLHLL-TEVV    | -PDIPVILDDTGYLFPETVYRFADALTEKLSL       | --LKVYQSPVSRAMWQEAR  | 132 |
| Prochlorococcus marinus        | -FVLTSSSTFGICSAVLLHLL-HGLDGG | --SVVPPVVDVDTGYLPAETVYFADALTEKLSL      | --LKVYQSTMSPARMEAL   | 130 |
| Trichodesmium erythraeum       | -LVMSSSTFGICSAVLLHLL-TSVI    | -PNIPVIVIDDTGYLPAETVYFAELIERKLSL       | --VKVYQSHISPARMEAL   | 123 |
| Synechococcus elongatus        | -LVLSSSTFGICSAVLLHLL-TQVQ    | -PDIPVILDDTGYLFPETVYRFADALTEKLSL       | --LKVYQSEISSPARMEAL  | 103 |
| Anabaena variabilis            | -LVQTSFANVVDLVIITHLISELKL    | -QVPPVIFLDTLHHPQOTLLELVAKAKHINLND      | --LQYVYKTPDVTDR-RAF  | 111 |
| Schizosaccharomyces pombe      | -LQQTAFGLTGLVLDML-SKMD       | -MNVPLIFLDTLHHPQOTLLELVAKAKHINLND      | --LQYVYKTPDVTDR-RAF  | 116 |
| Saccharomyces cerevisiae       | -LQQTAFGLTGLVLDML-SKLS       | -EKVYVPELFLDTLHHPQOTLLELVAKAKHINLND    | --LQYVYKTPDVTDR-RAF  | 118 |
| Thermosynechococcus elongatus  | -LVQTSFANVVDVITDILLRDLRP     | --NPPVPLVFLDTLHHPQOTLLELVAKAKHINLND    | --LQYVYKTPDVTDR-RAF  | 116 |
| Neurospora crassa              | -LQQTAFGLTGLVLDML-SKLAKE     | -PDAAVVDLIFLDTLHHPQOTLLELVAKAKHINLND   | --LQYVYKTPDVTDR-RAF  | 152 |
| Aspergillus fumigatus          | -LQQTAFGLTGLVLDML-SKLVQV     | --PRFQMVLDLIFLDTLHHPQOTLLELVAKAKHINLND | --LQYVYKTPDVTDR-RAF  | 146 |

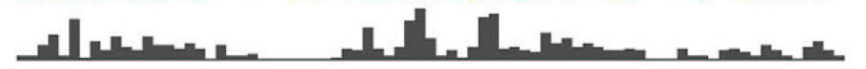

CLUSTAL X (1.81) MULTIPLE SEQUENCE ALIGNMENT



|                                |                                                                                     |     |
|--------------------------------|-------------------------------------------------------------------------------------|-----|
| [Mycobacterium tuberculosis]   | GKDLFAR---NPHECCRLRQVPLGKLRG---YSAWVGLRRVDAP--TRANAPLVVSFDET-----FKLVKVNPLAA        | 193 |
| [Pseudomonas aeruginosa]       | LFSFYRD--G--HGECGIRKIEPLRKLKLAG--VRAWAGQRRDDSPGTRSQVAVLEIDGAFSTPHK---PLYKFNPLSS     | 198 |
| [Pseudomonas syringae]         | LFSFYRD--G--HGECGIRKIEPLRKLKLAG--VKAWAGQRRDDSPGTRSAVAALVDSAFSTAES---TLYKFNPLAQ      | 175 |
| [Pseudomonas fluorescens]      | LFSFYKD--G--HGECGIRKIEPLRKLKLAG--VKAWAGQRRDDSPGTRSAVAAMEIDTAFSTPHR---TLYKFNPLAQ     | 175 |
| [Pseudomonas putida]           | LFSFYKD--G--HGECGIRKIEPLRKLKLAG--VSAWAGQRRDDSPGTRSQVAALVDSAFSTPHR---TLYKFNPLAQ      | 175 |
| [Azotobacter vinelandii]       | LFSFYKD--G--HGECGIRKIEPLRKLKLAG--VSAWAGQRRDDSPGTRSQVAVFEVVDGAFSTPHR---PLYKFNPLAQ    | 175 |
| [Methylococcus capsulatus]     | LFSFYRD--G--HGECGIRKVRPLRKLKLAG--LDAMIWGQRRDDQNP--TRQAVPEVREADPAFATGHH---PLVKFNPLAA | 172 |
| [Microbulbifer degradans]      | LFSFFED--N--HQECCGIRKRVGLRKLKLE--VDAWVQGRKDDSPGTRASIPVIGDNRVRFARPGD---TLTKFNPLVN    | 174 |
| [Ceratopteris richardii]       | MFSFYED--GHQECRIRKVRPLRRLALRG--LRAWITGQRKDDSPGTRSNIPVIGDNRVRFARPGD---TLTKFNPLVN     | 256 |
| [Polygonatum pubescens]        | LFSFYED--GHQECRIRKVRPLRRLALRG--LRAWITGQRKDDSPGTRASIPVIGDNRVRFARPGD---TLTKFNPLVN     | 259 |
| [Zea mays]                     | LFSFYED--GHQECRIRKVRPLRRLALRG--LRAWITGQRKDDSPGTRASIPVIGDNRVRFARPGD---TLTKFNPLVN     | 257 |
| [Lycopersicon esculentum]      | LFSFYED--GHQECRIRKVRPLRRLALRG--LRAWITGQRKDDSPGTRSEIPVIGDNRVRFARPGD---TLTKFNPLVN     | 260 |
| [Catharanthus roseus]          | LFSFYED--GHQECRIRKVRPLRRLALRG--LRAWITGQRKDDSPGTRSEIPVIGDNRVRFARPGD---TLTKFNPLVN     | 259 |
| [Brassica juncea]              | LFSFYED--GHQECRIRKVRPLRRLALRG--LRAWITGQRKDDSPGTRSEIPVIGDNRVRFARPGD---TLTKFNPLVN     | 261 |
| [Arabidopsis thaliana]         | LFSFYED--GHQECRIRKVRPLRRLALRG--LRAWITGQRKDDSPGTRSEIPVIGDNRVRFARPGD---TLTKFNPLVN     | 256 |
| [Lemna minor]                  | LFSFYED--GHQECRIRKVRPLRRLALRG--LRAWITGQRKDDSPGTRSEIPVIGDNRVRFARPGD---TLTKFNPLVN     | 261 |
| [Chlamydomonas reinhardtii]    | LYSFTE--GHTECCIRKRVPLRKLKLVG--LRAWITGQRKDDSPGTRSEIPVIGDNRVRFARPGD---TLTKFNPLVN      | 215 |
| [Nocardioideis sp. JS614 2]    | YGDLYK---TDPDLCCALRQVPLADALSG--YDAWAGLRRRATQ--HRVIAFVIGWADK---RQKVKVNSPLAR          | 215 |
| [Desulfitobacterium hafnienae] | PNAFYDK--VELRQKCCRLRQVPLRKLKLAG--VDAMIWGQRRDDSPGTRQETGLLEWDSR---HAIFYKFNPLAA        | 218 |
| [Pyrobaculum aerophilum]       | INPFYRD--VELRHLCCKIRKVNPLRRLALSG--LDAMIWGQRRDDSPGTRATRKIIDID--HDIYHG---LLKISPID     | 177 |
| [Clostridium thermocellum]     | PNPFYDS--VELRKKCCIRKVNPLRKLKLAG--VDAMIWGQRRDDSPGTRQETGLLEWDSR---HAIFYKFNPLAA        | 172 |
| [Bordetella parapertussis]     | MHAFYDS--VALRKACCEIRKVEPLRRLALSG--LDAMIWGQRRDDSPGTRQETGLLEWDSR---HAIFYKFNPLAA       | 176 |
| [Burkholderia mallei]          | LNAFYDS--VELRKKCCIRKVEPLRRLALSG--LDAMIWGQRRDDSPGTRQETGLLEWDSR---HAIFYKFNPLAA        | 170 |
| [Ralstonia eutropha]           | LNAFYDS--IDLKDCCKIRKVEPLRRLALSG--LDAMIWGQRRDDSPGTRQETGLLEWDSR---HAIFYKFNPLAA        | 199 |
| [Ralstonia solanacearum]       | LNAFYDS--IDLKDCCKIRKVEPLRRLALSG--LDAMIWGQRRDDSPGTRQETGLLEWDSR---HAIFYKFNPLAA        | 198 |
| [Dechloromonas aromatica]      | INAFYDS--VTLRKACCYARKVEPLRRLALSG--LDAMIWGQRRDDSPGTRQETGLLEWDSR---HAIFYKFNPLAA       | 175 |
| [Sinorhizobium meliloti]       | MNGFYDS--VBARHACCGVRKLEPLRRLALSG--LDAMIWGQRRDDSPGTRQETGLLEWDSR---HAIFYKFNPLAA       | 188 |
| [Wollinella succinogenes]      | EWGMRES--LNNRRCCKRVRKIEPLRKLKLAG--VDAMIWGQRRDDSPGTRQETGLLEWDSR---HAIFYKFNPLAA       | 158 |
| [Bacillus subtilis]            | DKLWER---EPNQCYYLRKVVPLRRLALSG--LDAMIWGQRRDDSPGTRQETGLLEWDSR---HAIFYKFNPLAA         | 173 |
| [Corynebacterium glutamicum]   | LNLYRS---NPAACCRMRKVEPLRRLALSG--LDAMIWGQRRDDSPGTRQETGLLEWDSR---HAIFYKFNPLAA         | 171 |
| [Corynebacterium efficiens]    | YGNLYR---SNFTACCRMRKVEPLRRLALSG--LDAMIWGQRRDDSPGTRQETGLLEWDSR---HAIFYKFNPLAA        | 201 |
| [Nocardioideis sp. JS614]      | IPPWST---DSNDCCKRRLRQVPLRKLKLAG--VDAMIWGQRRDDSPGTRQETGLLEWDSR---HAIFYKFNPLAA        | 169 |
| [Chloroflexus aurantiacus]     | EQFRS---DPDCCCRVRKVVPLRRLALSG--LDAMIWGQRRDDSPGTRQETGLLEWDSR---HAIFYKFNPLAA          | 156 |
| [Deinococcus geothermalis]     | DLTAS---DPDACCARVVTPLQAYLHKKASALLNARSDDQAA--TRADIPFVREGG---TRVKNINPLAY              | 174 |
| [Deinococcus radiodurans]      | DLTAS---DPDACCARVVTPLQAYLHKKASALLNARSDDQAA--TRADIPFVREGG---TRVKNINPLAY              | 190 |
| [Nitrobacter winogradskyi]     | ELWFS---DPDSCCRIRKVEPLRRLALSG--LDAMIWGQRRDDSPGTRQETGLLEWDSR---HAIFYKFNPLAA          | 190 |
| [Nitrobacter hamburgensis]     | DRDLWFS---DPDACCIRKVEPLRRLALSG--LDAMIWGQRRDDSPGTRQETGLLEWDSR---HAIFYKFNPLAA         | 208 |
| [Cytophaga hutchinsonii]       | RLLFIS---DPDYCCYLNRKVVPLRRLALSG--LDAMIWGQRRDDSPGTRQETGLLEWDSR---HAIFYKFNPLAA        | 154 |
| Salmonella typhimurium         | YGLLWEQ--GVEGIEKYNKINKVPMRRALDELNVGTFWFGRLRRDQSK--SRAGLPILSISQ---NGVFKFLPVID        | 184 |
| Escherichia coli               | YGLLWEQ--GVEGIEKYNKINKVPMRRALDELNVGTFWFGRLRRDQSK--SRAGLPILSISQ---NGVFKFLPVID        | 184 |
| Erwinia carotovora             | YGLLWDQ--GVEGIERYNLNLKVEPMRRALDELNVGTFWFGRLRRDQSK--SRAGLPILSISQ---NGVFKFLPVID       | 184 |
| Yersinia pseudotuberculosis    | YGLLWEQ--GVEGIERYNLNLKVEPMRRALDELNVGTFWFGRLRRDQSK--SRAGLPILSISQ---NGVFKFLPVID       | 184 |
| Zymomonas mobilis              | YGLLWEQ--GVEGIERYNLNLKVEPMRRALDELNVGTFWFGRLRRDQSK--SRAGLPILSISQ---NGVFKFLPVID       | 184 |
| Photobacterium luminescens     | YGLLWEQ--GVEGIERYNLNLKVEPMRRALDELNVGTFWFGRLRRDQSK--SRAGLPILSISQ---NGVFKFLPVID       | 184 |
| Vibrio parahaemolyticus        | YGLLWEQ--GVEGIEKYNKINKVPMRRALDELNVGTFWFGRLRRDQSK--SRAGLPILSISQ---NGVFKFLPVID        | 189 |
| Vibrio vulnificus              | YGLLWEQ--GIEGIEKYNKINKVPMRRALDELNVGTFWFGRLRRDQSK--SRAGLPILSISQ---NGVFKFLPVID        | 189 |
| Vibrio fischeri                | YGLLWEQ--GVEGIEKYNKINKVPMRRALDELNVGTFWFGRLRRDQSK--SRAGLPILSISQ---NGVFKFLPVID        | 184 |
| Vibrio cholerae                | YGLLWEQ--GVEGIERYNLNLKVEPMRRALDELNVGTFWFGRLRRDQSK--SRAGLPILSISQ---NGVFKFLPVID       | 187 |
| Photobacterium profundum       | BGKLWEQ--GVDGIKQYNRLNKVPMRRALDELNVGTFWFGRLRRDQSK--SRAGLPILSISQ---NGVFKFLPVID        | 184 |
| Candidatus Blochmannia         | YGLLWTD--GIEGIEKYNLNLKVEPMRRALDELNVGTFWFGRLRRDQSK--SRAGLPILSISQ---NGVFKFLPVID       | 192 |
| Candidatus Blochmannia         | YGLLWTD--GIEGIEKYNLNLKVEPMRRALDELNVGTFWFGRLRRDQSK--SRAGLPILSISQ---NGVFKFLPVID       | 185 |
| Buchnera aphidicola            | YGLLWEK--GIEGIDFYNNLNKVEPMRRALDELNVGTFWFGRLRRDQSK--SRAGLPILSISQ---NGVFKFLPVID       | 184 |
| Xanthomonas oryzae             | BGRLWEQ--GMVGDQYNNLRKVEPMRRALDELNVGTFWFGRLRRDQSK--SRAGLPILSISQ---NGVFKFLPVID        | 180 |
| Xanthomonas campestris         | BGRLWEQ--GMVGDQYNNLRKVEPMRRALDELNVGTFWFGRLRRDQSK--SRAGLPILSISQ---NGVFKFLPVID        | 180 |
| Xylella fastidiosa             | BGRLWEQ--GIDGIDQYNNLRKVEPMRRALDELNVGTFWFGRLRRDQSK--SRAGLPILSISQ---NGVFKFLPVID       | 176 |
| Thiocapsa roseopercinina       | LGRLEWQ--GADGIERYNRLNKVPMRRALDELNVGTFWFGRLRRDQSK--SRAGLPILSISQ---NGVFKFLPVID        | 180 |
| Pseudoalteromonas haloplanktis | FGKLWEQ--GEAGIKQYNLNLKVEPMRRALDELNVGTFWFGRLRRDQSK--SRAGLPILSISQ---NGVFKFLPVID       | 182 |
| Shewanella oneidensis          | FGQLWEQ--GVEGLERYNRLNKVPMRRALDELNVGTFWFGRLRRDQSK--SRAGLPILSISQ---NGVFKFLPVID        | 184 |
| Shewanella frigidimarina       | FGKLWEQ--GIDGLEKYNRLNKVPMRRALDELNVGTFWFGRLRRDQSK--SRAGLPILSISQ---NGVFKFLPVID        | 202 |
| Shewanella denitrificans       | FGKLWEQ--GLDGLEQYNRLNKVPMRRALDELNVGTFWFGRLRRDQSK--SRAGLPILSISQ---NGVFKFLPVID        | 198 |
| Shewanella amazonensis         | FGKLWEQ--GLDGLEKYNRLNKVPMRRALDELNVGTFWFGRLRRDQSK--SRAGLPILSISQ---NGVFKFLPVID        | 181 |
| Colwellia psychrotolerans      | YGDEWAQ--GEDALKANRRNKVPMRRALDELNVGTFWFGRLRRDQSK--SRAGLPILSISQ---NGVFKFLPVID         | 189 |
| Crocospaera watsonii           | YGLLWQD--DLNSLNRKVEPMRRALDELNVGTFWFGRLRRDQSK--SRAGLPILSISQ---NGVFKFLPVID            | 201 |
| Prochlorococcus marinus        | YGLLWET--GSKVDLETYHRIRKVEPLRKLKLAG--VDAMIWGQRRDDSPGTRQETGLLEWDSR---HAIFYKFNPLAA     | 199 |
| Trichodesmium erythraeum       | YGLLWAEKDL--EALNRKQDQIRKVEPMRRALDELNVGTFWFGRLRRDQSK--SRAGLPILSISQ---NGVFKFLPVID     | 192 |
| Synechococcus elongatus        | YGLLWESV--DFNRYDQMRKVEPMRRALDELNVGTFWFGRLRRDQSK--SRAGLPILSISQ---NGVFKFLPVID         | 172 |
| Anabaena variabilis            | YAKYGEALWDKDI--TQFHQVTRIEPLRKLKLAG--VDAMIWGQRRDDSPGTRQETGLLEWDSR---HAIFYKFNPLAA     | 181 |
| Schizosaccharomyces pombe      | AQKFGKLEWET--DESRVDFLAKVEPAHRAVSDLNVAVFTGRRRS--GG--ERGLPIVGLD---GPVLKINPLAN         | 185 |
| Saccharomyces cerevisiae       | ASKYGDFLWEK--DDEKDYDLAKVEPAHRAVSDLNVAVFTGRRRS--GG--ERGLPIVGLD---GPVLKINPLAN         | 189 |
| Thermosynechococcus elongatus  | AARYGDKLWET--VVEQFHHLLTIEPLRKLKLAG--VDAMIWGQRRDDSPGTRQETGLLEWDSR---HAIFYKFNPLAA     | 186 |
| Neurospora crassa              | EALYGEKLYET--SEELDWIAKVEPNRAVYQELKVAAVFTGRRRS--GG--ARGSPVILBEE---RGVTKINPLAN        | 223 |
| Aspergillus fumigatus          | SKYTGAKLWET--DDQFVWVAKVEPAORAYRELNVHVAVFTGRRRS--GG--KRGDLDVIEVDBAG---LIKVNPLAN      | 216 |

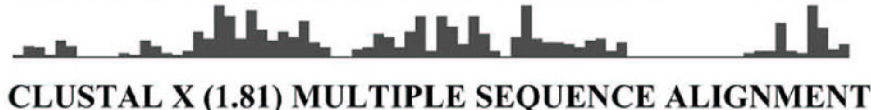

CLUSTAL X (1.81) MULTIPLE SEQUENCE ALIGNMENT



# Page 4 of APSr and PAPSr sequences

| [Mycobacterium tuberculosis]   | WDQDQVEYIADNDVLPVNLVREYFISIGCAPCHA    | KFAEG     | --- | ADFRSGRWQL    | --- | AKTECGLHAS           | 254 |
|--------------------------------|---------------------------------------|-----------|-----|---------------|-----|----------------------|-----|
| [Pseudomonas aeruginosa]       | MTSEEWVGMIRMLELPYNLSLHERGYIIGCEPCTR   | PVLP      | --- | NQHEREGRWWWE  | --- | EATKKECGLHAGNLIASKA  | 267 |
| [Pseudomonas syringae]         | MSSEEWVGMIRMLELPYNLSLHERGFISIGCEPCTR  | PVLP      | --- | NQHEREGRWWWE  | --- | EATKKECGLHAGNLIIVRD  | 244 |
| [Pseudomonas fluorescens]      | MTSEEWVGMIRMLELPYNLSLHERGYIIGCEPCTR   | PVLP      | --- | NQHEREGRWWWE  | --- | EATKKECGLHAGNLIASKA  | 244 |
| [Pseudomonas putida]           | MSSEEWVGMIRMLELPYNLSLHERGFISIGCEPCTR  | PVLP      | --- | NQHEREGRWWWE  | --- | ESTKKECGLHAGNLIASKA  | 244 |
| [Azotobacter vinelandii]       | MSSEEWVGMIRMLELPYNLSLHERGFISIGCEPCTR  | PVLP      | --- | NQHEREGRWWWE  | --- | EATKKECGLHAGNLIASKA  | 244 |
| [Methylococcus capsulatus]     | WTSQAQVMDVITACEIPFNALHLKDFGVYIGCEPCTR | PVPR      | --- | QHHEREGRWWWE  | --- | DALKKECGLHIGDASRV    | 240 |
| [Microbulfiber degradans]      | WTSQAQVMDVITACEIPFNALHLKDFGVYIGCEPCTR | PTGP      | --- | QHHEREGRWWWE  | --- | EATKKECGLHAGNLIIVRD  | 241 |
| [Ceratopteris richardii]       | VTGTDIWSFLRTMNPVNLVSLHSGYVIGCEPCTR    | AVLPG     | --- | MHEREGRWWWE   | --- | AKAKECGLHAGNLIASKA   | 325 |
| [Polygonatum pubescens]        | VDGKDVNFRITMNPVNLVSLHSGYVIGCEPCTR     | PVLPFG    | --- | QHHEREGRWWWE  | --- | AKAKECGLHAGNLIASKA   | 328 |
| [Zea mays]                     | VDGKDIWFLRTMNPVNLVSLHSGYVIGCEPCTR     | PVLPFG    | --- | QHHEREGRWWWE  | --- | AKAKECGLHAGNLIASKA   | 326 |
| [Lycopersicon esculentum]      | VDGKDIWFLRTMNPVNLVSLHSGYVIGCEPCTR     | PVLPFG    | --- | QHHEREGRWWWE  | --- | AKAKECGLHAGNLIASKA   | 329 |
| [Catharanthus roseus]          | VEGKDIWFLRTMNPVNLVSLHSGYVIGCEPCTR     | PVLPFG    | --- | QHHEREGRWWWE  | --- | AKAKECGLHAGNLIASKA   | 328 |
| [Brassica juncea]              | VEGNDVWNFLRTMNPVNLVSLHSGYVIGCEPCTR    | AVLPG     | --- | QHHEREGRWWWE  | --- | AKAKECGLHAGNLIASKA   | 330 |
| [Arabidopsis thaliana]         | VEGNDVWNFLRTMNPVNLVSLHSGYVIGCEPCTR    | AVLPG     | --- | QHHEREGRWWWE  | --- | AKAKECGLHAGNLIASKA   | 325 |
| [Lemna minor]                  | VDGQDIWFLRTMNPVNLVSLHSGYVIGCEPCTR     | PVLPFG    | --- | QHHEREGRWWWE  | --- | AKAKECGLHAGNLIASKA   | 330 |
| [Chlamydomonas reinhardtii]    | MTSAEAVNFRIVMKNVPTNKLKNCGYIIGCEPCTR   | PVLPFN    | --- | QAHEREGRWWWE  | --- | AAAKECGLHAGNLIASKA   | 284 |
| [Nocardiooides sp. JS614 2]    | WTDEEIERIADHDVLPVNLVPLAYDGYPSIGCWPCR  | RVAPG     | --- | EDFRSGRWAGT   | --- | TKTECGIHS            | 275 |
| [Desulfitobacterium hafniense] | WSSEQVWVYIRRENIPYSSLNKGFYRIGCQPCR     | AVAFG     | --- | ADVRSGRWWWE   | --- | DFSKKKEGLHPSLNPPAK   | 287 |
| [Pyrobaculum aerophilum]       | WTDWVWQYIKKYNLPYCKLYDRGYIIGCEPCTR     | PTFVSLGDV | --- | GEELRKGGRWWWE | --- | KNAPKECGIHCSLEAGS    | 251 |
| [Clostridium thermocellum]     | WSEDRVWEIKIKYINIPYNSLHSGYRIGCQPCR     | AVRF      | --- | GEDVRSGRWWWE  | --- | DFDKKKEGLHAGNLIASKA  | 239 |
| [Bordetella parapertussis]     | WNEADVMSVIRALGIPYNSLHSGYRIGCQPCR      | AVRF      | --- | GEDVRSGRWWWE  | --- | SSDSKKECGLHAGNLIASKA | 245 |
| [Burkholderia mallei]          | WTESDVAWYLNADFVNPVNLVREYFISIGCEPCTR   | AIRP      | --- | GEDSRAGRWWWE  | --- | SRDTKKECGLHITITVFP   | 238 |
| [Ralstonia eutropha]           | WTEAEVWYALKRRNVPVNLVSLHSGYRIGCEPCTR   | AVRAG     | --- | EDLRAGRWWWE   | --- | SKDSKKEGLHAGNLIASKA  | 266 |
| [Ralstonia solanacearum]       | WTEAEVWYALKRRNVPVNLVSLHSGYRIGCEPCTR   | AVRAG     | --- | EDLRAGRWWWE   | --- | SRDSKKECGLHAGNLIASKA | 267 |
| [Dechloromonas aromatica]      | WTEKEVWTYIKQNAVYPVNLVREYFISIGCAPCHA   | AISP      | --- | GEDIAGRWWWE   | --- | NPEKKECGLHAGNLIASKA  | 239 |
| [Sinorhizobium meliloti]       | WGETTQAAVAAEGIPVNLVREYFISIGCEPCTR     | AIKP      | --- | GEPERAGRWWWE  | --- | NDEKKECGLHAGNLIASKA  | 257 |
| [Wolinella succinogenes]       | WSLETEVFEYIKKHALPLHPLVTEYRIGSPCTR     | AIEAG     | --- | EELRAGRWWWE   | --- | NPEKKECGLHAGNLIASKA  | 227 |
| [Bacillus subtilis]            | WTWKDIWRYSRNELDVNPVNLVREYFISIGCAPCHA  | PAFTA     | --- | EDLRSGRWNG    | --- | MAKTECGLHE           | 233 |
| [Corynebacterium glutamicum]   | WSLEEINEFIADNLDHPLHSGYRIGCAPCHA       | PVAEG     | --- | QDFRAGRWAG    | --- | NAKTECGLHE           | 231 |
| [Corynebacterium efficiens]    | WSLEEINEFIADNLDHPLHSGYRIGCAPCHA       | PVAEG     | --- | QDFRAGRWAG    | --- | NAKTECGLHE           | 261 |
| [Nocardiooides sp. JS614]      | WTDEALAAHLHEHALPQNRLLGEYFISIGCEPCTR   | LVFV      | --- | GTARSGRWNG    | --- | QHKTECGLHAS          | 229 |
| [Chloroflexus aurantiacus]     | WRREQIEAFQAHLVNPVNLVREYFISIGCWPCR     | AVRPG     | --- | EDVRSGRWNG    | --- | KGKIECGLWIGEQSL      | 221 |
| [Deinococcus geothermalis]     | WTRERLETYAREHDLVNPVNLVREYFISIGCWPCR   | AVRPG     | --- | EDARAGRWAG    | --- | KGKIECGLWIGEQSL      | 239 |
| [Deinococcus radiodurans]      | WTREQLEAYAAEHDLVNPVNLVREYFISIGCWPCR   | AVKPG     | --- | EDARAGRWAG    | --- | KGKIECGLWIGEQSL      | 255 |
| [Nitrobacter winogradskyi]     | ASREDEIAYASAKLPPHPLVAGSFRVSGMPCPTS    | RQAG      | --- | EDARAGRWRG    | --- | RAKTECGIHTMKI        | 254 |
| [Nitrobacter hamburgensis]     | ASRADTEIAYASAKLPPHPLVAGSFRVSGMPCPTS   | RAQAG     | --- | EDARAGRWRD    | --- | AKTECGIHTMKI         | 272 |
| [Cytophaga hutchinsonii]       | WDVVMIEKIKKHKLPVNPVNLVREYFISIGCEPCTR  | KFDLET    | --- | YNRQGRWFG     | --- | LNKTECGLHAGNLIASKA   | 224 |
| Salmonella typhimurium         | WDNRTVYQYLKQKGLKYLHPLWDEGYLAVGDTHTR   | KWEPG     | --- | MABEETRFVGL   | --- | KRECGLHEG            | 240 |
| Escherichia coli               | WDNRTVYQYLKQKGLKYLHPLWDEGYLAVGDTHTR   | KWEPG     | --- | MABEETRFVGL   | --- | KRECGLHEG            | 244 |
| Erwinia carotovora             | WDNRTVYQYLKQKGLKYLHPLWDEGYLAVGDTHTR   | KWEPG     | --- | MSEETRFVGL    | --- | KRECGLHEG            | 244 |
| Yersinia pseudotuberculosis    | WDNRQVYQYLKQKGLKYLHPLWDEGYLAVGDTHTR   | KWEPG     | --- | MSEETRFVGL    | --- | KRECGLHEG            | 244 |
| Zymomonas mobilis              | WDNRKIHVYKLENDLPHVPLWDEGYLAVGDTHTR    | KWEPG     | --- | MSEETRFVGL    | --- | KRECGLHEG            | 244 |
| Photorhabdus luminescens       | WDNRVHVQYLTKHGLEHPLWDEGYLAVGDTHTR     | KWEPG     | --- | MSEETRFVGL    | --- | KRECGLHEN            | 244 |
| Vibrio parahaemolyticus        | WTNKKDVHYLKEHGLVYHPLWDEGYLAVGDTHTR    | KWEPG     | --- | MSEETRFVGL    | --- | KRECGLHEDDQNEQD      | 255 |
| Vibrio vulnificus              | WTNKKDVHYLKEHGLVYHPLWDEGYLAVGDTHTR    | KWEPG     | --- | MSEETRFVGL    | --- | KRECGLHEDDQNEQD      | 254 |
| Vibrio fischeri                | WTNKKDVHYLKEHGLVYHPLWDEGYLAVGDTHTR    | KWEPG     | --- | MSEETRFVGL    | --- | KRECGLHEDDQNEQD      | 249 |
| Vibrio cholerae                | WTNKKDVHYLKEHGLVYHPLWDEGYLAVGDTHTR    | KWEPG     | --- | MSEETRFVGL    | --- | KRECGLHEDDQNEQD      | 252 |
| Photobacterium profundum       | WTDNDIEQYLNQYDLVYHPLWDEGYLAVGDTHTR    | KWEPG     | --- | MTEETRFVGL    | --- | KRECGLHEDDQNEQD      | 249 |
| Candidatus Blochmannia         | WNSLQIHRVYIEKHSLEYHPLWQGYVSVGDVHSTK   | KWEPG     | --- | MKEDTRFVGL    | --- | QRECGLHIE            | 253 |
| Candidatus Blochmannia florida | WDHNQVHQYIKRVDLEYHPLWQGYVSVGDVHSTK    | KKEPG     | --- | MKEDTRFVGL    | --- | QRECGLHIE            | 246 |
| Buchnera aphidicola            | WSKDKIKDLKENNLDLPHVPLWQGYVSVGDVHSTK   | KMPG      | --- | MLEETRFVGL    | --- | KRECGLHEN            | 244 |
| Xanthomonas oryzae             | WTDREVWQYLQAHALPYHPLWQGYVSVGDVHSTK    | RWEPG     | --- | MREDTRFVGL    | --- | KRECGIHEDI           | 241 |
| Xanthomonas campestris         | WTDREVWQYLQAHALPYHPLWQGYVSVGDVHSTK    | RWEPG     | --- | MREDTRFVGL    | --- | KRECGIHEDI           | 241 |
| Xylella fastidiosa             | WTDREIWEYMKHHDLPYHPLWQGYVSVGDVHSTK    | PLEPG     | --- | MREDTRFFFG    | --- | KRECGIHENI           | 237 |
| Thiocapsa roseopercarina       | WHRPFRARLRHDLPHPLWQGYVSVGDVHSTK       | PLLPG     | --- | MLEETRFVGL    | --- | KRECGIHR             | 239 |
| Pseudoalteromonas haloplanktis | WTDREIWEYMKHHDLPYHPLWQGYVSVGDVHSTK    | KLEPG     | --- | MTEETRFVGL    | --- | NRECGLHIDGDI         | 246 |
| Shewanella oneidensis          | WSNKKDVHLYLQYDLVYHPLWQGYVSVGDVHSTK    | PLELG     | --- | MTEETRFVGL    | --- | KRECGLHIEI           | 245 |
| Shewanella frigidimarina       | WSNKKDVHLYLQYDLVYHPLWQGYVSVGDVHSTK    | PLELG     | --- | MSEETRFVGL    | --- | QRECGLHEDI           | 263 |
| Shewanella denitrificans       | WSNKKDVHLYLQYDLVYHPLWQGYVSVGDVHSTK    | PLELG     | --- | MSEETRFVGL    | --- | KRECGLHIEI           | 259 |
| Shewanella amazonensis         | WSNKKDVHLYLQYDLVYHPLWQGYVSVGDVHSTK    | PLELG     | --- | MSEETRFVGL    | --- | KRECGLHIEI           | 242 |
| Colwellia psycherythraea       | WSNKKDVHLYLQYDLVYHPLWQGYVSVGDVHSTK    | PLTIG     | --- | MSEEDTRFVGL   | --- | QRECGLHIDGDI         | 253 |
| Crocospaera watsonii           | WDSRDYHLYLQYDLVYHPLWQGYVSVGDVHSTK     | PLMADD    | --- | SEEDSRFVGG    | --- | KOEGLHLNLSFGAA       | 268 |
| Prochlorococcus marinus        | WTPKEVYVYMQEHQLPQHPLEFKGYVSVGDVHSSA   | PDGGG     | --- | ASGRETRFVGL   | --- | KOEGLHLPLQVLEGG      | 265 |
| Trichodesmium erythraeum       | WNARDIYQYLTANHPLPYHPLWQGYVSVGDVHSSR   | PLTDD     | --- | QDRDTRFVGL    | --- | KOEGLHLPLQVLEGG      | 259 |
| Synechococcus elongatus        | WHSRDVYQYLQYDLVYHPLWQGYVSVGDVHSSR     | PLQAD     | --- | SDRSTRFVGL    | --- | KOEGLHL              | 232 |
| Anabaena variabilis            | WTRQDQVAVAEHGVYVPLWQGYVSVGDVHSTK      | KVGGG     | --- | EDERAGRWRGSR  | --- | KTECGIHI             | 241 |
| Schizosaccharomyces pombe      | WSPTVEVNYIITNVPVNLVREYFISIGCEPCTR     | PVREG     | --- | EDERAGRWRGSR  | --- | KTECGIHSHPQSKFA      | 252 |
| Saccharomyces cerevisiae       | WTFEQVKQYIDANNVPVNLVREYFISIGCEPCTR    | PVREG     | --- | EDERAGRWRGSR  | --- | KTECGIHSHPQSKFA      | 256 |
| Thermosynechococcus elongatus  | WTRKQVAVAEHGVYVPLWQGYVSVGDVHSTK       | PIAEG     | --- | EDERAGRWRGSR  | --- | KTECGIHI             | 246 |
| Neurospora crassa              | WSFQVQVAVAEHGVYVPLWQGYVSVGDVHSTK      | PVAAG     | --- | EDERAGRWRGSR  | --- | NKTECGIHNKQSRVYQ     | 290 |
| Aspergillus fumigatus          | WTFEQVKQYIKENDVPVNLVREYFISIGCEPCTR    | PVKEN     | --- | EDFRSGRWKQ    | --- | EKTECGIHNPRSKVYQ     | 283 |



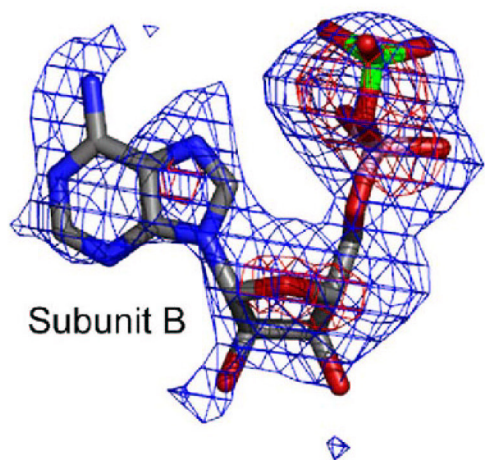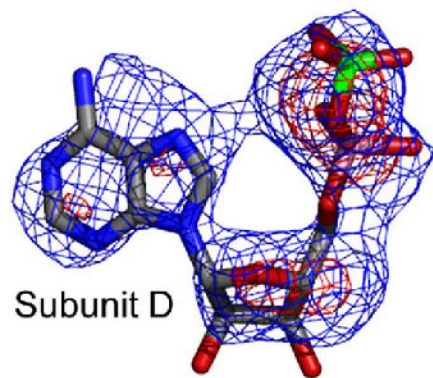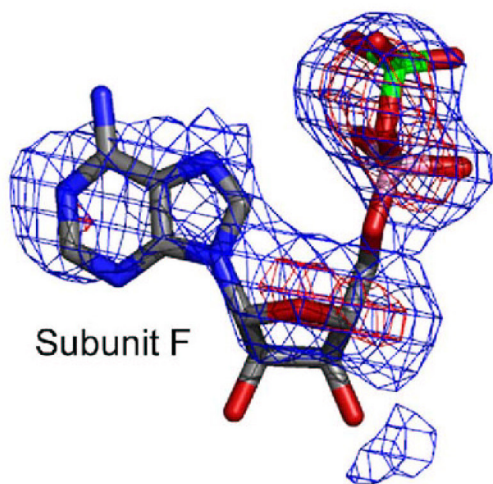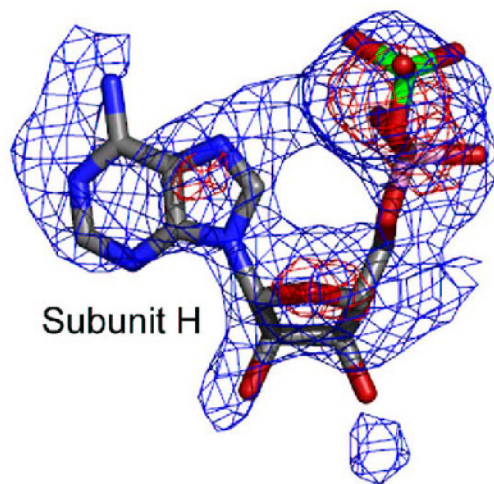

**Supplementary Fig.3**

a

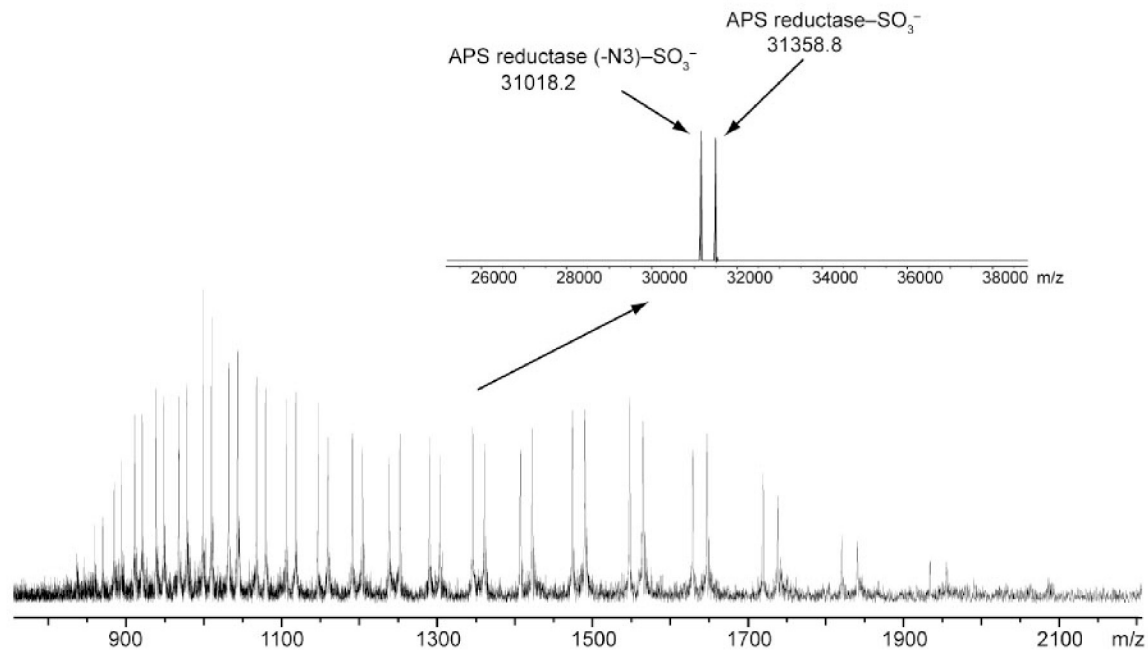

Supplementary Fig. 4a

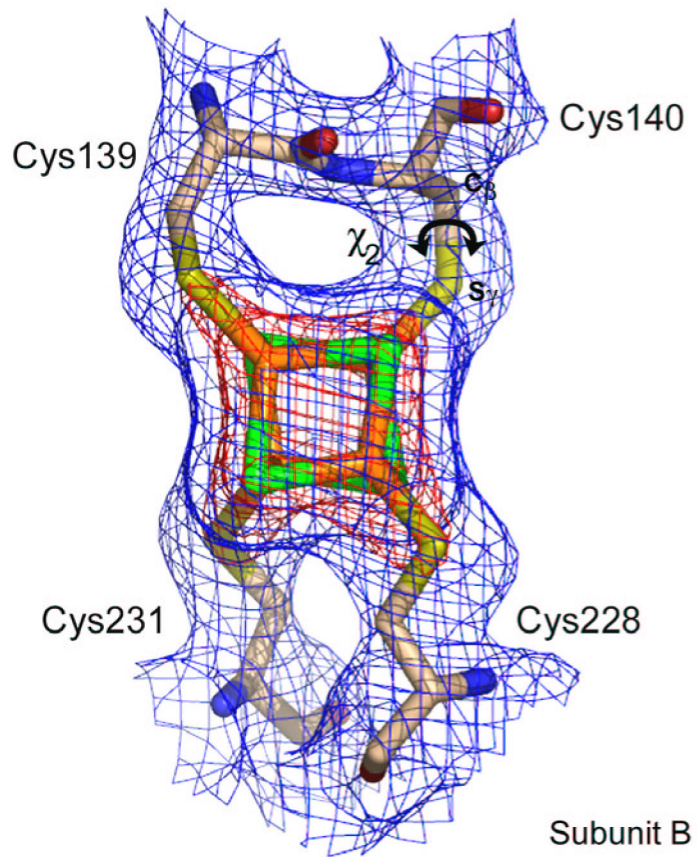

Supplementary Fig. 6

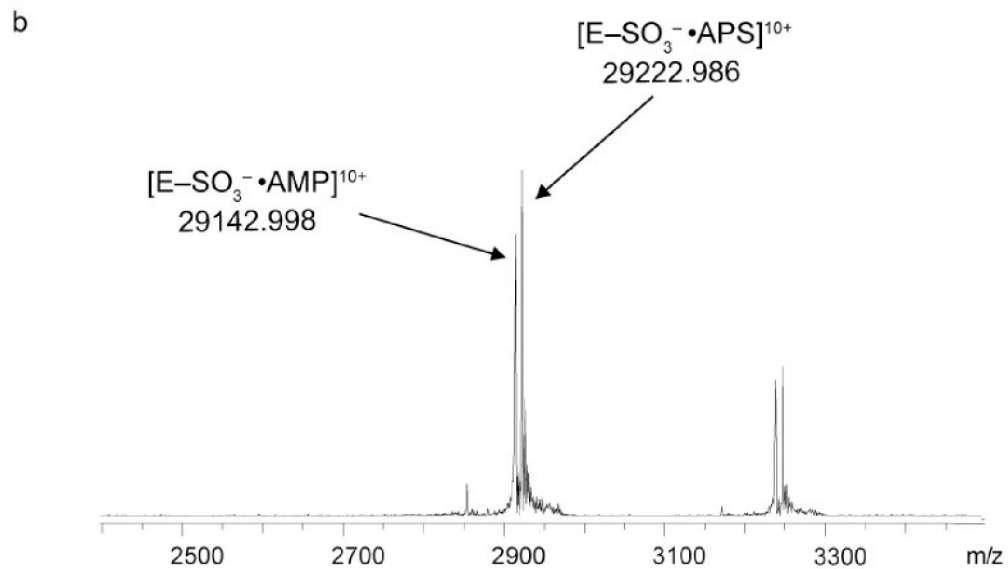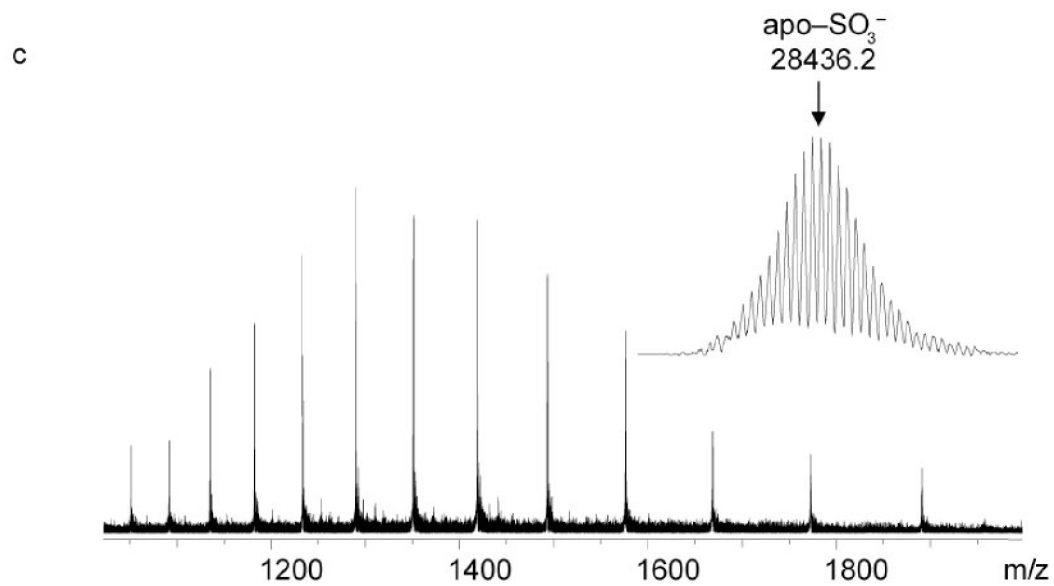

Supplementary Figs. 4 b and c

**a**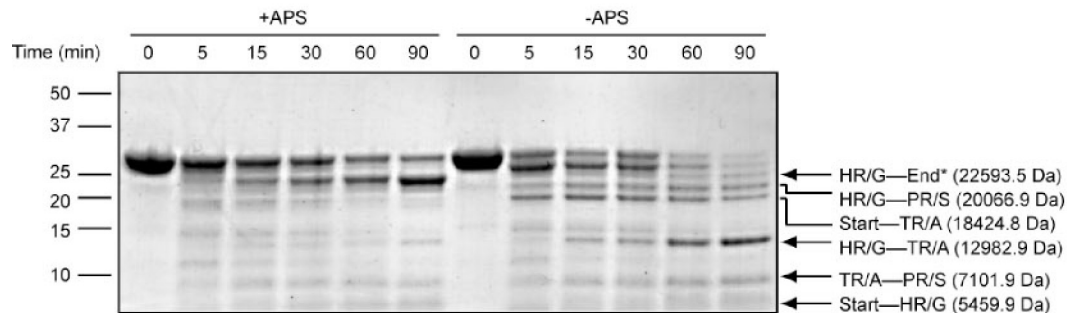**b**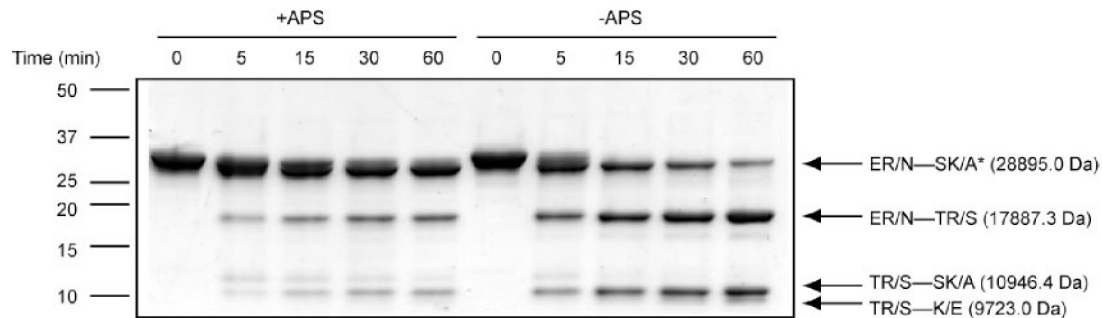**Supplementary Fig. 5**
